# Supplementary material
Source: PubMed Central journal article supplement (PMC395894)

*nNOS*

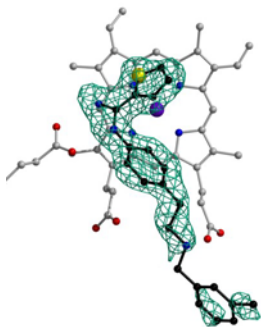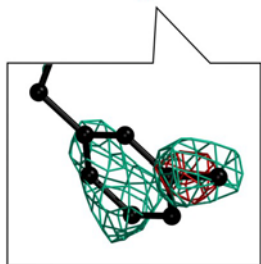

*iNOS (mol.1)*

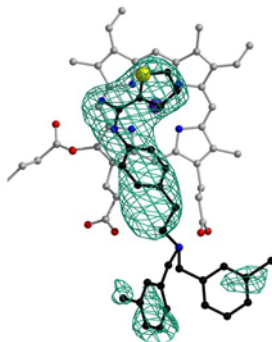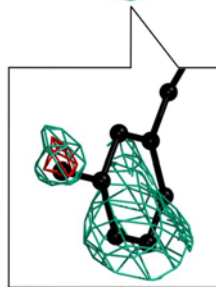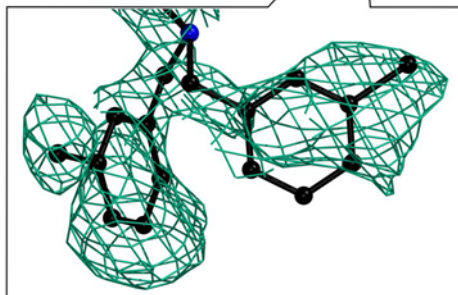

Supplement: pnas_101_16_5892__2.pdf [file pnas_101_16_5892__2.pdf]
